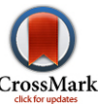

# Calcium-Activated Potassium Current Modulates Ventricular Repolarization in Chronic Heart Failure

Ingrid M. Bonilla<sup>1,2</sup>, Victor P. Long, III<sup>1,2</sup>, Pedro Vargas-Pinto<sup>3\*</sup>, Patrick Wright<sup>2</sup>, Andriy Belevych<sup>2</sup>, Qing Lou<sup>2</sup>, Kent Mowrey<sup>4</sup>, Jae Yoo<sup>1</sup>, Philip F. Binkley<sup>2</sup>, Vadim V. Fedorov<sup>2</sup>, Sandor Györke<sup>2</sup>, Paulus M. L. Janssen<sup>2</sup>, Ahmet Kilic<sup>2</sup>, Peter J. Mohler<sup>2</sup>, Cynthia A. Carnes<sup>1,3\*</sup>

**1** College of Pharmacy, The Ohio State University, Columbus, Ohio, United States of America, **2** Dorothy M. Davis Heart and Lung Research Institute, The Ohio State University Wexner Medical Center, Columbus, Ohio, United States of America, **3** College of Veterinary Medicine, The Ohio State University, Columbus, Ohio, United States of America, **4** St Jude Medical, Sylmar, California, United States of America

## Abstract

The role of  $I_{KCa}$  in cardiac repolarization remains controversial and varies across species. The relevance of the current as a therapeutic target is therefore undefined. We examined the cellular electrophysiologic effects of  $I_{KCa}$  blockade in controls, chronic heart failure (HF) and HF with sustained atrial fibrillation. We used perforated patch action potential recordings to maintain intrinsic calcium cycling. The  $I_{KCa}$  blocker (apamin 100 nM) was used to examine the role of the current in atrial and ventricular myocytes. A canine tachypacing induced model of HF (1 and 4 months,  $n=5$  per group) was used, and compared to a group of 4 month HF with 6 weeks of superimposed atrial fibrillation ( $n=7$ ). A group of age-matched canine controls were used ( $n=8$ ). Human atrial and ventricular myocytes were isolated from explanted end-stage failing hearts which were obtained from transplant recipients, and studied in parallel. Atrial myocyte action potentials were unchanged by  $I_{KCa}$  blockade in all of the groups studied.  $I_{KCa}$  blockade did not affect ventricular myocyte repolarization in controls. HF caused prolongation of ventricular myocyte action potential repolarization.  $I_{KCa}$  blockade caused further prolongation of ventricular repolarization in HF and also caused repolarization instability and early afterdepolarizations. SK2 and SK3 expression in the atria and SK3 in the ventricle were increased in canine heart failure. We conclude that during HF,  $I_{KCa}$  blockade in ventricular myocytes results in cellular arrhythmias. Furthermore, our data suggest an important role for  $I_{KCa}$  in the maintenance of ventricular repolarization stability during chronic heart failure. Our findings suggest that novel antiarrhythmic therapies should have safety and efficacy evaluated in both atria and ventricles.

**Citation:** Bonilla IM, Long VP III, Vargas-Pinto P, Wright P, Belevych A, et al. (2014) Calcium-Activated Potassium Current Modulates Ventricular Repolarization in Chronic Heart Failure. PLoS ONE 9(10): e108824. doi:10.1371/journal.pone.0108824

**Editor:** Blanca Rodriguez, University of Oxford, United Kingdom

**Received:** March 27, 2014; **Accepted:** August 26, 2014; **Published:** October 1, 2014

**Copyright:** © 2014 Bonilla et al. This is an open-access article distributed under the terms of the Creative Commons Attribution License, which permits unrestricted use, distribution, and reproduction in any medium, provided the original author and source are credited.

**Data Availability:** The authors confirm that all data underlying the findings are fully available without restriction. All relevant data are within the paper.

**Funding:** Pacemakers and leads provided by St. Jude Medical, Sylmar, CA as an in-kind donation (Carnes). Research supported in part by NIH grants (R01-HL115580 to CAC and VVF; R01-HL089836 to CAC; HL074045 to SG; HL084583, HL083422, HL114383 to PJM) and the American Heart Association (PJM). The funders had no role in study design, data collection and analysis, decision to publish or preparation of the manuscript.

**Competing Interests:** The authors have declared that no competing interests exist.

\* Email: carnes.4@osu.edu

‡ Current address: University of LaSalle, Bogota, Columbia

## Introduction

Heart failure (HF) is a chronic disease that develops over months to years, and is defined by insufficient cardiac output to meet the physiologic and metabolic needs of the body. Atrial fibrillation (AF) and HF are common coexisting disease states, and HF results in a 4.5 to 5.9 fold increase in the risk of developing AF. [1] Moreover, in patients with HF, the development of AF significantly increases the risk of death. [2] Thus, identifying and elucidating pharmacological targets to treat AF may significantly reduce mortality and morbidity in HF.

Small-conductance  $Ca^{2+}$ -activated  $K^+$  (SK) channels are expressed in multiple tissues such as skeletal and smooth muscle, the central and peripheral nervous system and the heart. [3–5] Cardiac myocytes express SK1, SK2 and SK3 gene products. [6] SK- encoded current is voltage-independent and activated by intracellular calcium. [7] All three members of the SK family have similar calcium sensitivity for activation (0.6–0.7  $\mu M$ ) [8]. SK-

encoded current is blocked by apamin, a constituent of bee venom, which appears to be highly selective for  $I_{KCa}$ . [7,9,10].

$I_{KCa}$ , the potassium current conducted by SK channels, contributes to repolarization, [3,11] but the importance of  $I_{KCa}$  in repolarization remains poorly elucidated. For example, ventricular  $I_{KCa}$  shortens repolarization and promotes peri-infarct arrhythmias in rats. [12] Conversely, blockade of  $I_{KCa}$  promotes ventricular arrhythmias in human HF and a non-ischemic rabbit HF model, suggesting a protective role for  $I_{KCa}$ . [13,14] The contribution of  $I_{KCa}$  to atrial repolarization is also unclear as some reports demonstrate that  $I_{KCa}$  is proarrhythmic while others suggest it is protective. [15,16].

We measured the impact of  $I_{KCa}$  block on action potentials in intact myocytes using perforated patch recordings to maintain intrinsic  $Ca^{2+}$  cycling. We utilized a well-validated canine model that emulates all key features of human HF including chamber dilatation, impaired contractility, impaired functional capacity, repolarization abnormalities, dysregulated myocyte calcium

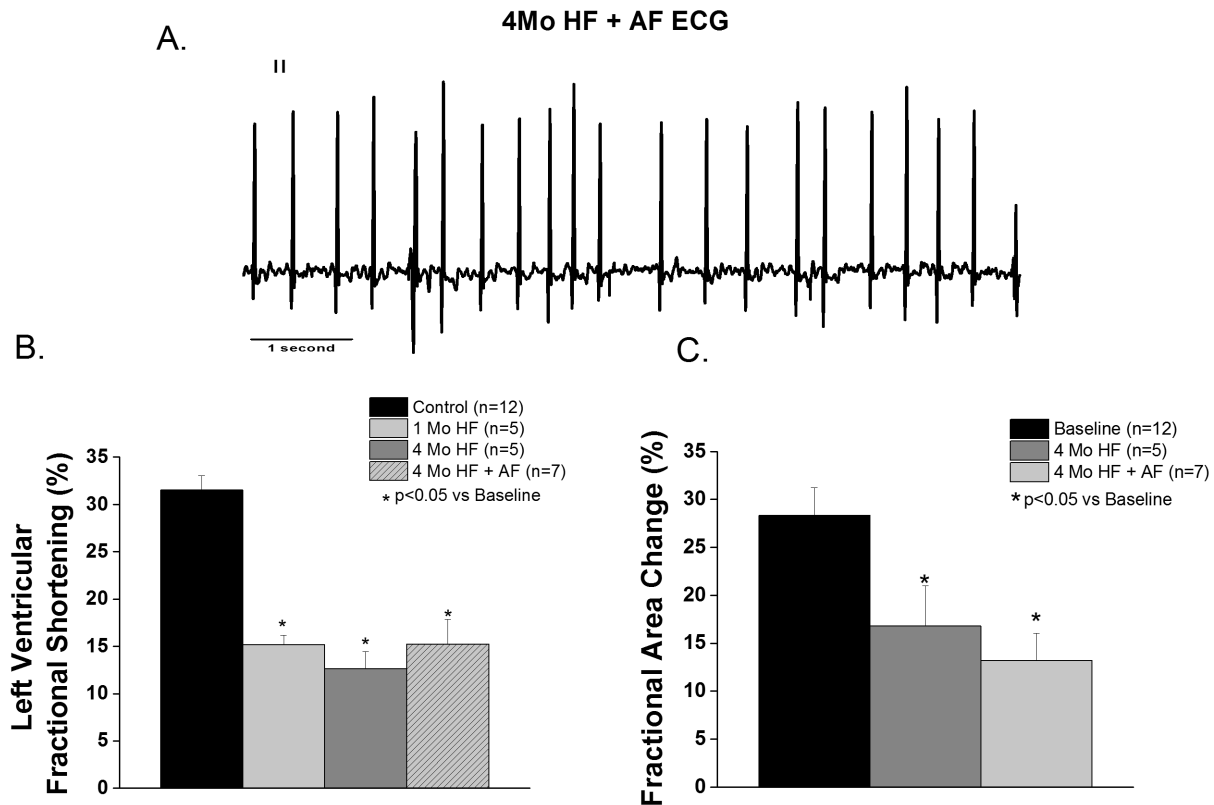

**Figure 1. In vivo data from 1 month (1 Mo), 4 month (4 Mo), and 4 month HF with sustained AF (4 Mo HF+AF) canine groups. A.** Representative ECG recording from a 4 month HF+AF dog showing the absence of P waves and irregularly irregular QRS complexes characteristic of AF. **B.** LVFS was similarly decreased in the 1 month HF, 4 month HF and the 4 month HF+AF groups compared to baseline. ( $p < 0.05$  vs baseline). **C.** Atrial contractility was decreased in 4 month HF and 4 month HF+AF groups compared to baseline. ( $p < 0.05$ ,  $N = 5-7$  per group). doi:10.1371/journal.pone.0108824.g001

handling, increased predisposition to AF and increased myocardial fibrosis. [17,18] Complementary experiments were conducted in end-stage human HF. The role of  $I_{KCa}$  in AF was evaluated in atrial myocytes from a canine model of chronic HF with sustained AF.

## Methods

### Heart failure and atrial fibrillation animal models

All animal procedures conformed to the Guide for the Care and Use of Laboratory Animals of the National Institutes of Health, and were approved by the Ohio State University Institutional Animal Care and Use Committee (Protocol: 2010A0000103-R1). Canine heart failure was induced by right ventricular (RV) tachypacing as previously described. [19] Animals were assigned to one or four months of RV tachypacing to induce heart failure.

Atrial fibrillation was induced in dogs with HF using a customized pacemaker (St Jude Medical, Sylmar, CA). One pacing lead was implanted in the right atria (RA) and the second lead was implanted in the RV, with HF induced as previously described. [20] After 10 weeks of RV tachypacing, RA tachypacing was initiated, with the RA stimulated at 10 Hz for 60 seconds, followed by a 10 second pause for automated interrogation of atrial rhythm. This cycle of RA tachypacing was repeated every 70 seconds until AF was detected. Subsequent detection of normal atrial rhythm resulted in resumption of the atrial tachypacing. The total HF duration in the HF+AF group was 4 months. Ventricular pacing was stopped during atrial stimulation, and the ventricular rate was 150–200 BPM during atrial pacing or AF. Serial

echocardiograms and ECGs were performed as previously reported. [17,21] Serial pacemaker interrogations were used to monitor cardiac rhythm.

### Myocyte Isolation and Tissue Collection

On the day of the terminal procedure, the dogs were anesthetized with pentobarbital sodium (50 mg/kg intravenously; Nembutal, Abbott Laboratories). The heart was rapidly removed and perfused with cold cardioplegia solution containing the following (mM): NaCl 110,  $CaCl_2$  1.2, KCl 16,  $MgCl_2$  16 and  $NaHCO_3$  10. Cannulation of the left circumflex artery was used to perfuse left atria and ventricle following removal of the right atrium and right ventricle, as previously described. [22] Adjacent tissue samples were collected and snap frozen for protein analyses. Tyrode's solution (mM) containing NaCl 130, KCl 5.4,  $MgCl_2$  3.5,  $NaH_2PO_4$  0.5, Glucose 10, HEPES 5 and taurine 20, was used as the initial perfusate. During the cell isolation process the heart was perfused with three different solutions (36°C). The heart was initially perfused for 10 minutes with Tyrode's solution with 0.1 mM EGTA; this was followed by perfusion with Tyrode's solution containing 0.3 mM Calcium, 0.12 mg/ml of Trypsin Inhibitor (NIBCO) and 1.33 mg/ml of collagenase (Type II, Worthington) for a maximum of 45 minutes. Then following enzymatic digestion, the heart was perfused with normal Tyrode's solution for five minutes to remove residual enzyme. Subsequently, left ventricular mid-myocardial and left atrial myocytes were obtained through secondary digestion, as previously described. [22] After secondary digestion the cells were re-suspended in

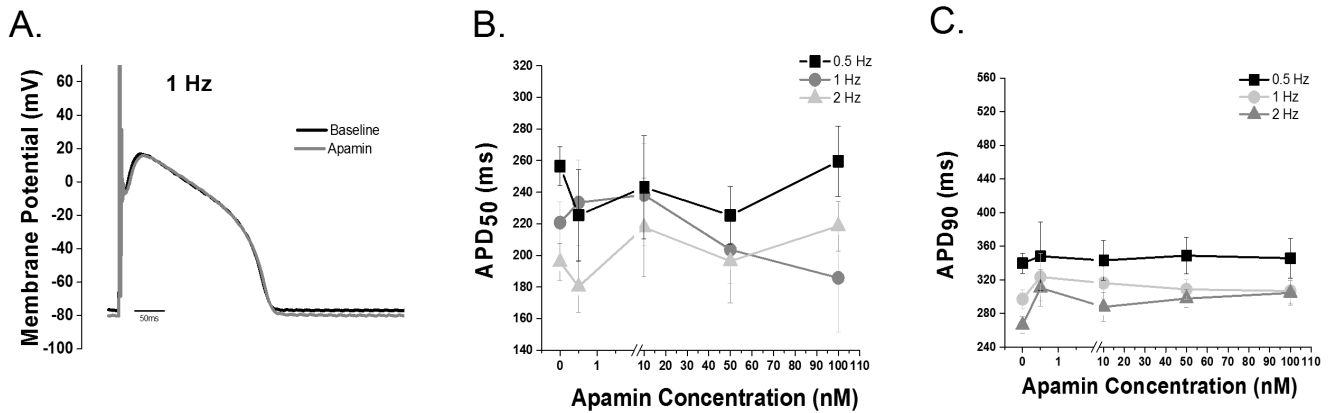

**Figure 2.  $I_{KCa}$  inhibition does not alter repolarization in control ventricular cells.** **A.** Representative action potential tracing before and after 100 nM apamin recorded at 1 Hz. **B.** APD<sub>50</sub> and **C.** APD<sub>90</sub> dose response data (0–100 nM apamin) recorded at stimulation rates of 0.5, 1 and 2 Hz. ( $p = NS$ ,  $n = 5–11$  cells per group; 8 animals). The Grubb's test for outlier data was applied and one cell was rejected and is not included in the summary data.  
doi:10.1371/journal.pone.0108824.g002

incubation buffer. [23] This isolation procedure typically yields 70–90% and 40–60% rod shaped ventricular and atrial myocytes, respectively. All myocyte electrophysiology experiments were conducted within 10 hours of isolation.

In parallel experiments, failing human cardiac tissue was obtained after written informed consent with the documentation of consent securely stored as approved by the Institutional Review Board approval of The Ohio State University (IRB 2008H0113

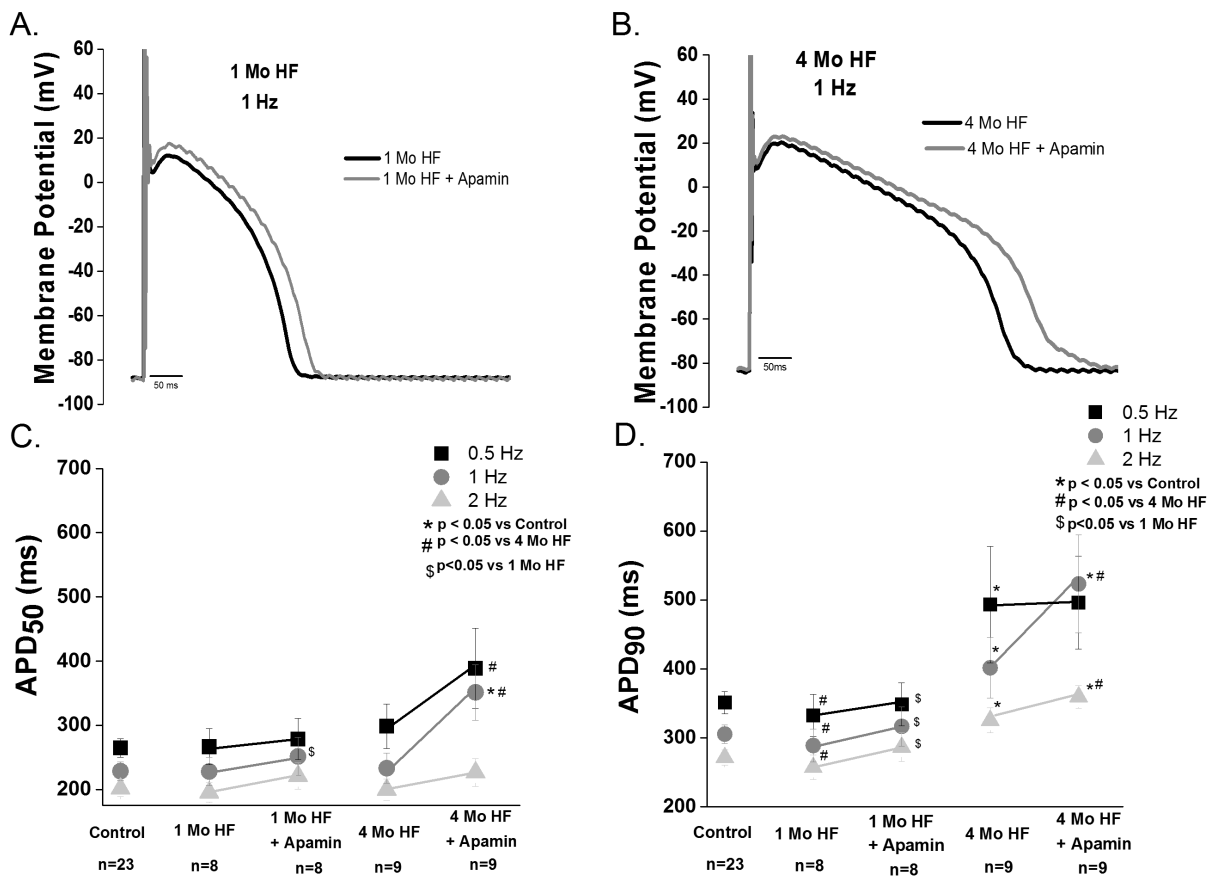

**Figure 3. Apamin modulates ventricular repolarization during HF.** Representative action potential of a 1 month (**A**) HF and 4 month HF (**B**) ventricular cell before and after apamin superfusion. **C.** Summary data of APD<sub>50</sub> in control, 1 month and 4 month HF before and after apamin treatment. No difference between 1 month HF, 4 month HF and control is observed (2–8 animals per group). Apamin treatment of 1 month HF cells causes a prolongation only at 2 Hz ( $p < 0.05$ ), likewise apamin treatment of 4 month HF cells causes a prolongation at 0.5 Hz ( $p < 0.05$ ) and 1 Hz ( $p < 0.05$ ). **D.** Apamin prolongs APD<sub>90</sub> in both 1 and 4 month HF ( $p < 0.05$ ).  
doi:10.1371/journal.pone.0108824.g003

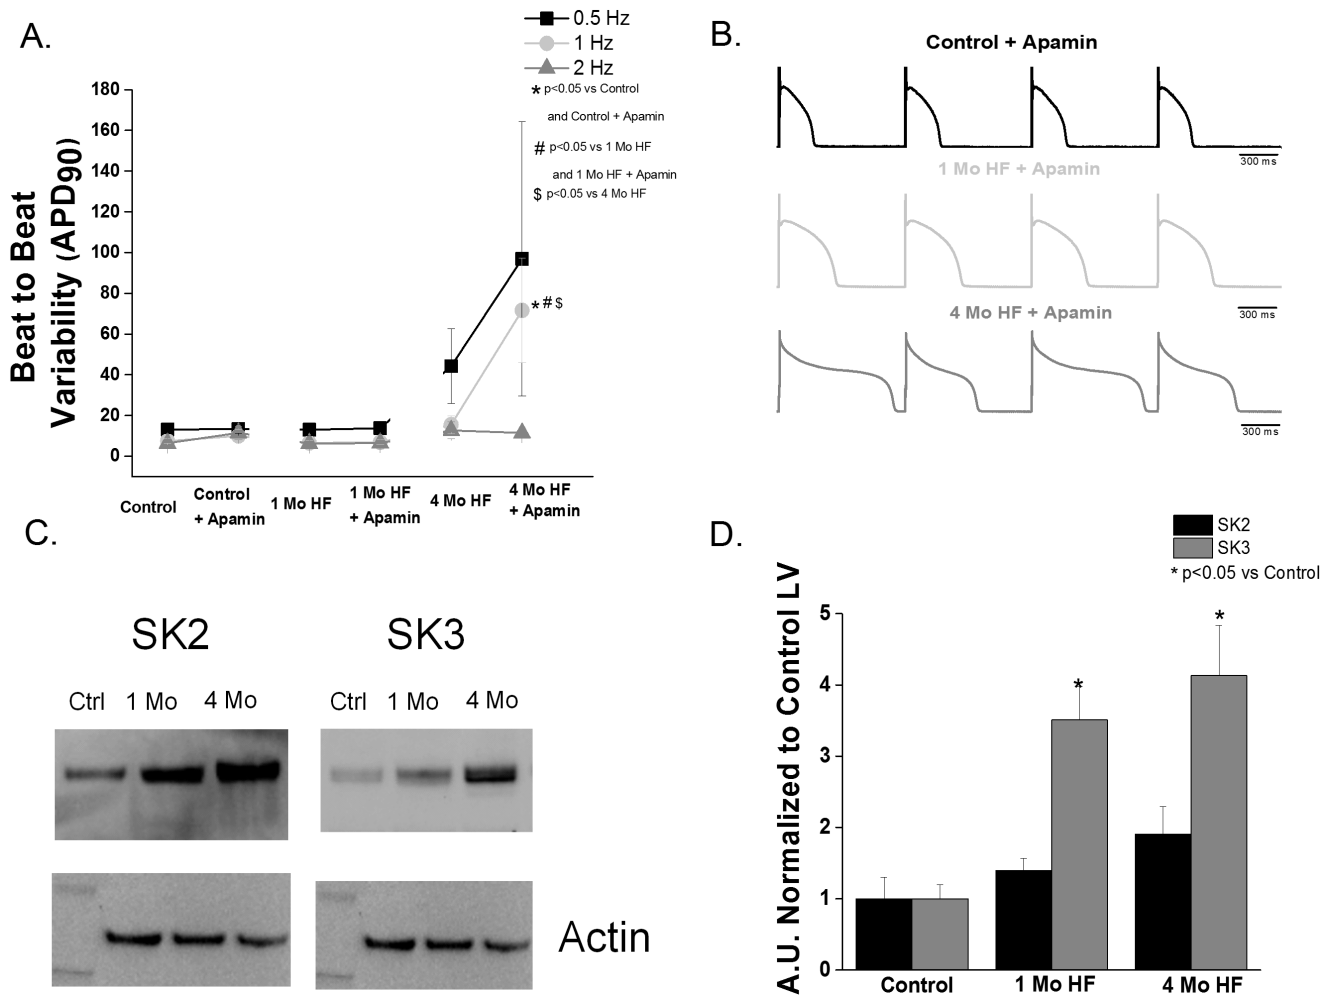

**Figure 4.  $I_{KCa}$  contributes to ventricular repolarization stability in canine HF, and HF increases SK3 expression.** **A.** Beat to beat variability of APD<sub>90</sub> (BTBV, ms) is unchanged in both 1 month or 4 month HF vs. controls.  $I_{KCa}$  block increases the BTBV in the 4 month, but not the 1 month HF group ( $p < 0.05$  vs control, 1 month HF and 4 month HF; 2–8 animals per group). **B.** Representative AP tracings of control, 1 month HF and 4 month HF during superfusion with 100 nm apamin. ( $p < 0.05$  vs control) while SK2 is unchanged ( $N = 4–5$ ). **C.** Representative blots of SK2 and SK3. **D.** SK3 in the 1 and 4 month HF groups is increased ( $p < 0.05$  vs control) while SK2 is unchanged ( $N = 4–5$ ). doi:10.1371/journal.pone.0108824.g004

and IRB 2012H0197), in accordance with the 1964 Declaration of Helsinki and its later amendments. Additional human cardiac tissue was obtained from the Lifeline of Ohio Organ Procurement program (<http://lifelineofohio.org>). For these tissues, the Institutional Review Board waived the need for consent and these tissues were used according to the Ohio State University guidelines regarding the use of data and/or specimens.

Left ventricular mid-myocardial and left atrial appendage myocytes were isolated and adjacent tissues were collected from explanted end-stage failing hearts ( $n = 6$ ; obtained from the Ohio State University Wexner Medical Center transplant program). After cannulation of a superficial coronary artery to perfuse the left atrium and/or left ventricle, the methods for myocyte isolation were as described for canine samples above. Left ventricular mid myocardium and left atrial appendage tissues were collected from non-failing heart for Western blotting purposes ( $n = 8$  obtained from Lifeline of Ohio). Non-HF status was confirmed in these tissues by lack of CaMKII pS286 hyperphosphorylation.

#### Action Potential (AP) Measurements

Amphotericin-B perforated patch clamp techniques with a bath temperature of  $36 \pm 0.5^\circ\text{C}$  were used. The myocytes were placed in a laminin-coated cell chamber (Cell Microcontrols, Norfolk, VA) and superfused ( $\sim 1$  mL/min) with bath solution containing (mM): 135 NaCl, 5 MgCl<sub>2</sub>, 5 KCl, 10 glucose, 1.8 CaCl<sub>2</sub>, and 5 HEPES with pH adjusted to 7.40 with NaOH. Borosilicate glass micropipettes with tip resistance of 1.5–3 M $\Omega$ , were filled with pipette solution containing the following (mM): 100 K-aspartate, 40 KCl, 5 MgCl, 5 EGTA, 5 HEPES, pH adjusted to 7.2 with KOH.

APs were recorded in a train of 25 traces at 0.5, 1 and 2 Hz at baseline and after apamin perfusion. The average of the last 10 traces (i.e. from trace 16–25) was used to calculate the action potential duration (APD). APD was calculated at 50 and 90 percent of repolarization (APD<sub>50</sub> and APD<sub>90</sub>).

To evaluate repolarization instability, beat to beat variability (BTBV) of APD<sub>90</sub> was assessed as the standard deviation of the APD<sub>90</sub>, as previously described. [24,25] Early afterdepolarization (EAD) propensity was assessed as the percentage of cells exhibiting

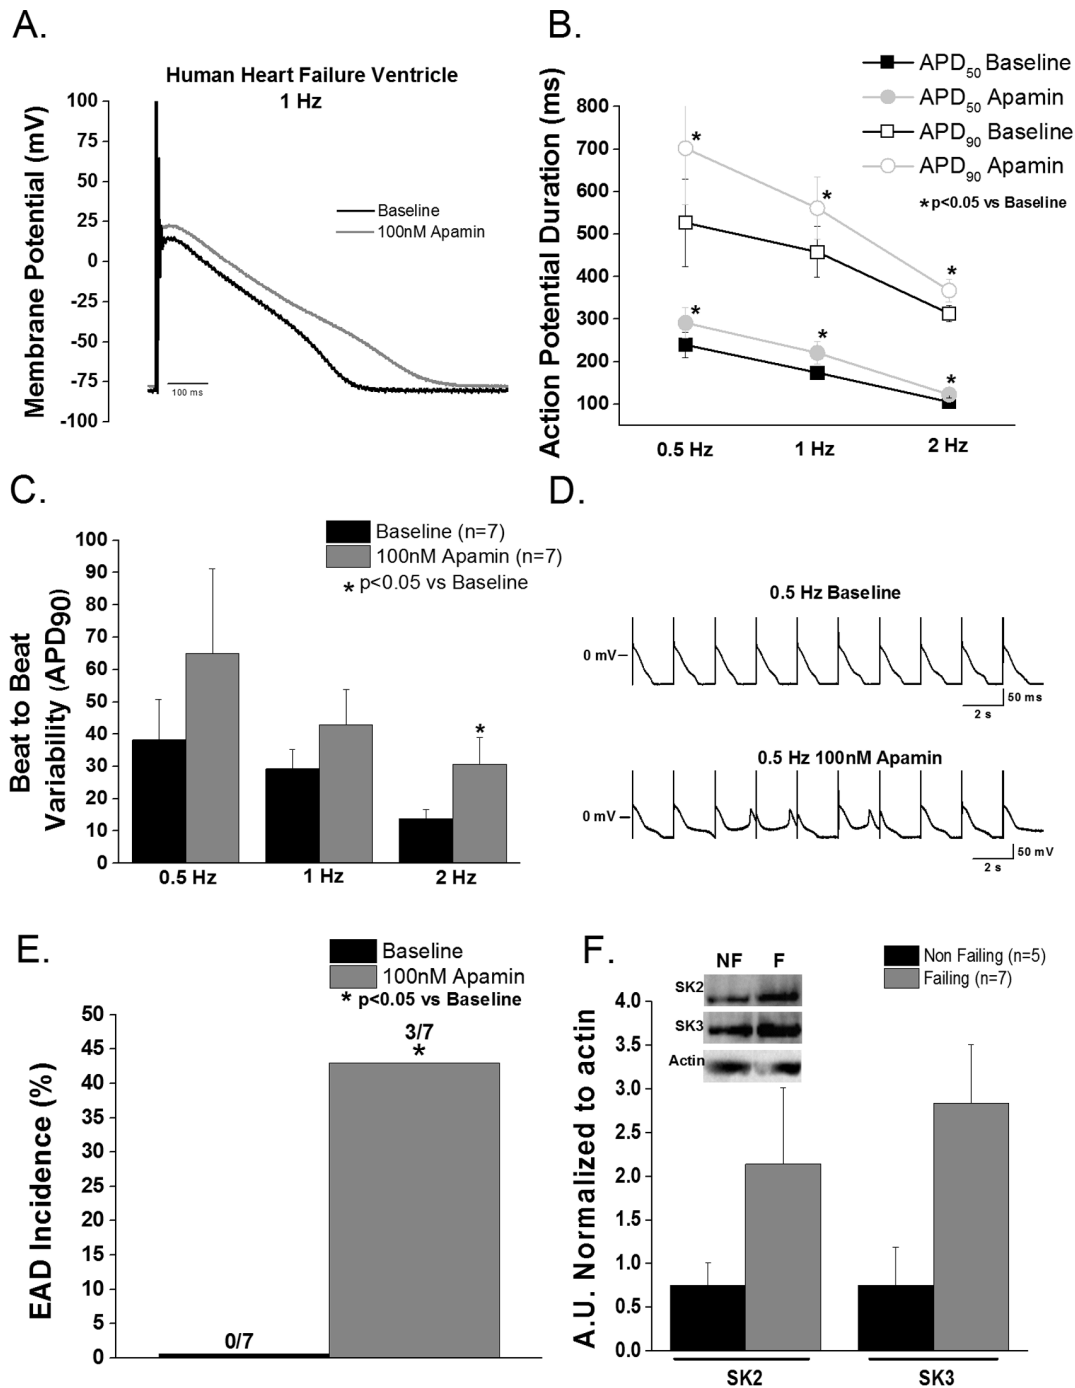

**Figure 5. Apamin modulates ventricular repolarization in end-stage human HF.** **A.** Representative action potential recorded at 1 Hz from an end-stage human HF ventricular myocyte before and after apamin. **B.** Apamin superfusion prolongs APD<sub>50</sub> and APD<sub>90</sub> in end-stage human HF ventricular myocytes at all rates ( $p < 0.05$  vs baseline,  $n = 7$ ). **C.** Apamin superfusion increases ( $p < 0.05$  vs baseline) BTBV (ms) at 2 Hz. **D.** Representative action potential showing late phase 3 EADs after apamin superfusion. **E.** Apamin treatment increases EAD incidence in failing human ventricular myocytes. ( $p < 0.05$  vs baseline) **F.** Representative blots of control and end-stage human HF SK2 and SK3 proteins (SK2  $p = 0.556$  and SK3  $p = 0.141$  vs. control). HF:  $N = 7$  (4 male/3 female); age =  $52 \pm 13$  years and LV ejection fraction of  $14.5 \pm 5.2\%$ ; non-failing controls:  $n = 5$  (2 male/3 female); age =  $47 \pm 12$  years. doi:10.1371/journal.pone.0108824.g005

EADs. Recordings exhibiting EADs were excluded from APD and BTBV measurements.

Data collection was done at baseline and after superfusion with the  $I_{KCa}$  blocker apamin (100 nM), a concentration known to block SK1, SK2 and SK3 encoded-current.[26–28] An Axopatch

200A amplifier with Digidata 1440A (Molecular devices, Sunnyvale, CA) and Clampex 10.2 software was used for data acquisition. At the initiation of each recording the resting potential was examined. For canine cells, atrial cells with a resting membrane potential of  $\geq -55$  mV were recorded; for ventricular

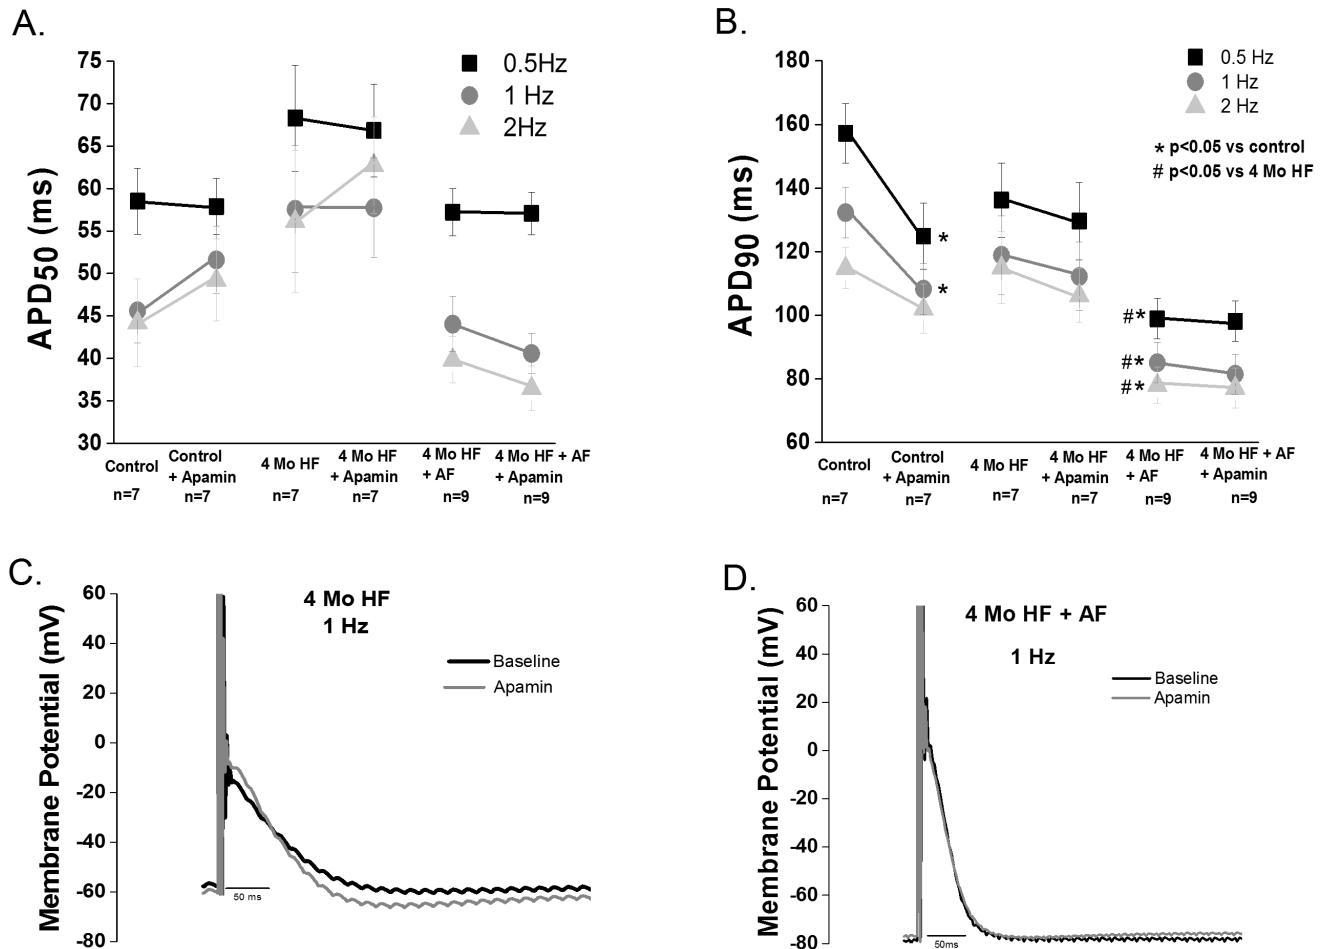

**Figure 6.  $I_{KCa}$  block does not affect repolarization in normal or diseased atrial myocytes.** **A.** 100 nM apamin does not affect atrial APD<sub>50</sub> in any of the studied groups (i.e. control, 4 month HF and 4 month HF+AF, n = 7–9 cells per group) **B.** 100 nM apamin shortened the APD<sub>90</sub> in controls at 0.5 and 1 Hz. ( $p < 0.05$ ). HF+AF had a shorter baseline APD<sub>90</sub> compared to control and HF ( $p < 0.05$ ), however no change in APD<sub>90</sub> was observed after apamin treatment in either 4 month HF or 4 month HF+AF groups. (n = 7–9 cells per groups) **C and D.** Atrial action potential tracings before and after apamin treatment from the 4 month HF group and the 4 month HF+ AF group (2–6 animals per group). doi:10.1371/journal.pone.0108824.g006

cells those with a resting membrane potential of  $\geq -70$  mV were recorded. For the human cells, every cell with complete baseline and apamin-treatment data was included. One apamin-treated ventricular canine cell action potential recording was excluded as an outlier.

### Calcium transient Measurements

Calcium transients were recorded using  $Ca^{2+}$  sensitive dye Fluo-4AM (10  $\mu$ M) and an Olympus Fluoview 1000 confocal microscope in line scan mode. Myocytes were loaded with dye for 25 minutes at room temperature. Fluo-4 was excited with a 488 nm argon laser and fluorescence collected at wavelength 500–600 nm. Myocytes were paced by extracellular stimulation at 1 Hz with platinum electrodes. External solution contained (mM): 140 NaCl, 5.4 KCl, 2  $CaCl_2$ , 0.5  $MgCl_2$ , 10 HEPES and 5.6 glucose (pH 7.3).

### Immunoblots

Following protein quantification, tissue lysates were analyzed on Mini-PROTEAN tetra cell (BioRad) on a 4–15% precast TGX gel (BioRad) in Tris/Glycine/SDS Buffer (BioRad). Gels were transferred to a nitrocellulose membrane using the Mini-

PROTEAN tetra cell (BioRad) in Tris/Glycine buffer with 20% methanol (v/v, BioRad). Membranes were blocked for 1 hour at room temperature using a 3% BSA solution and incubated with primary antibody overnight at 4°C. Antibodies included: SK2 (Alomone, Santa Cruz), SK3 (Alomone, Santa Cruz), GAPDH (Fitzgerald), and actin (Sigma). Secondary antibodies included donkey anti-mouse-HRP and donkey anti-rabbit-HRP (Jackson Laboratories). Densitometry was performed using Image lab software and all data was normalized to GAPDH or actin levels present in each sample.

### Data Analysis

Cellular electrophysiology and  $Ca^{2+}$  imaging data were analyzed using Clampfit 10.3 software (Axon Instruments) and Origin 9.0 software (OriginLab, Northampton, MA, USA). APD data was examined for outliers by application of the Grubb's test, which rejected one control ventricular myocyte (GraphPad). All APD paired data were compared by paired student t-test. Unpaired data and comparisons between groups were analyzed by one-way ANOVA with post hoc least significant difference testing. Differences in EADs incidence were tested with Pearson's Chi-Square test. For protein experiments, differences were

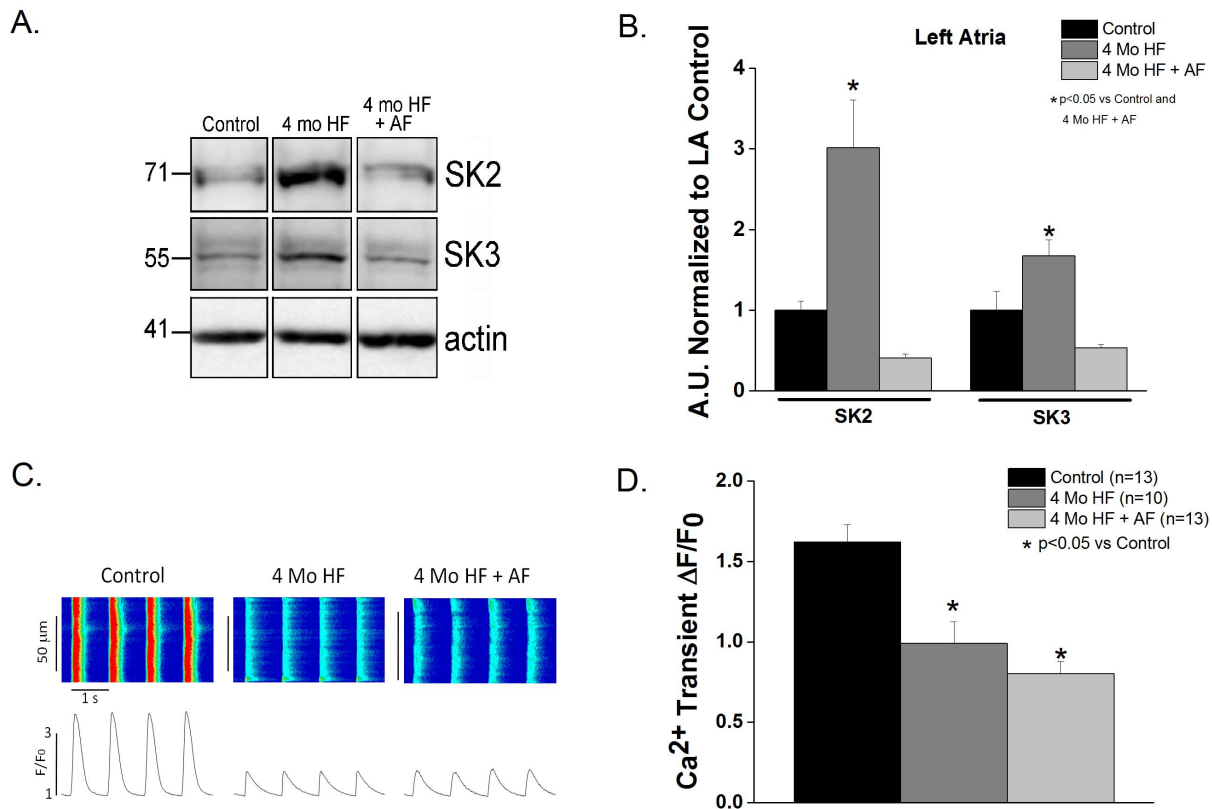

**Figure 7. Atrial SK expression and calcium transients in chronic HF with and without AF.** **A.** Representative Western blots of SK2 and SK3. **B.** SK2 and SK3 are increased 3- and 2-fold, respectively in the 4 month HF atria. ( $p < 0.05$  vs control and 4 month HF+AF) No differences between control and 4 month HF+AF were found in any of the subunits. ( $N = 3$ ) **C.** Representative calcium transient line scans. **D.** Calcium transient amplitude was decreased in the 4 month HF and 4 month HF+AF groups compared to control ( $p < 0.05$  vs control; 3–8 animals per group). doi:10.1371/journal.pone.0108824.g007

assessed with a paired Student's *t* test (2-tailed) or ANOVA, as appropriate, for continuous data. The Bonferroni test was used for post-hoc testing. All data are presented as mean  $\pm$  SE and  $p < 0.05$  was the criterion for statistical significance for all comparisons.

## Chemicals

All chemicals were purchased from Sigma-Aldrich (St. Louis, MO, USA) and Fisher Scientific (Pittsburg, PA, USA), unless otherwise noted. All buffers and solutions were prepared daily.

## Results

### In vivo cardiac remodeling

Left ventricular fractional shortening (LVFS) was similarly reduced in the 1 month HF, 4 month HF and 4 month HF+AF groups (Figure 1B), consistent with HF. Electrocardiograms (ECGs) in all canines assigned to the HF+ AF group demonstrated sustained atrial tachyarrhythmias, evident as the absence of P waves and the irregularly irregular ventricular rate characteristic of AF (Figure 1A). Additionally, atrial contractility, measured as left atrial fractional area change (FAC), was significantly reduced in both the 4 month HF and 4 month HF+AF groups compared to baseline ( $p < 0.05$ ) as shown in Figure 1C. Notably, the presence of sustained AF did not cause a further decrement in atrial contractility compared to HF alone.

### $I_{KCa}$ inhibition in control ventricular myocytes

Action potentials before and after apamin treatment were recorded from control canine ventricular myocytes. Varying apamin concentrations (0.5–100 nM) were tested in order to generate a concentration response curve. Apamin did not alter  $APD_{50}$  or  $APD_{90}$  in control ventricular myocytes (Figure 2A).

### $I_{KCa}$ inhibition and SK expression in failing ventricle

**Canine.** We observed no HF-induced difference in  $APD_{50}$  or  $APD_{90}$  in the 1 month HF myocytes compared with control myocytes. However, apamin (100 nM) caused a significant prolongation of the  $APD_{90}$  in one month HF ( $p < 0.05$ ; Figure 3 A–D). In contrast to 1 month HF, 4 month HF significantly increased  $APD_{90}$  relative to control ventricular myocytes ( $p < 0.05$  vs control). Furthermore, when  $I_{KCa}$  was blocked in 4 month HF ventricular myocytes (100 nM apamin), there was a significant prolongation of the  $APD_{50}$  at lower rates (i.e.  $p < 0.05$  vs control at 0.5 and 1 Hz) and a further prolongation in the  $APD_{90}$  ( $p < 0.05$  vs control and baseline 4 month HF).

In order to assess repolarization instability induced by block of  $I_{KCa}$ , we measured the beat to beat variability (BTBV) of  $APD_{90} \pm$  apamin. HF alone did not increase the BTBV in either HF group compared to controls. Block of  $I_{KCa}$  significantly increased BTBV in the 4 month, but not one month, HF group. (Figure 4A,B).

Canine cardiac  $I_{KCa}$  encoding proteins SK2 and SK3 were measured in control, 1 month HF and 4 month HF ventricular tissues. No significant change in SK2 protein expression in either HF group ( $p > 0.05$  vs control) was found. An  $\sim$ 4-fold increase in

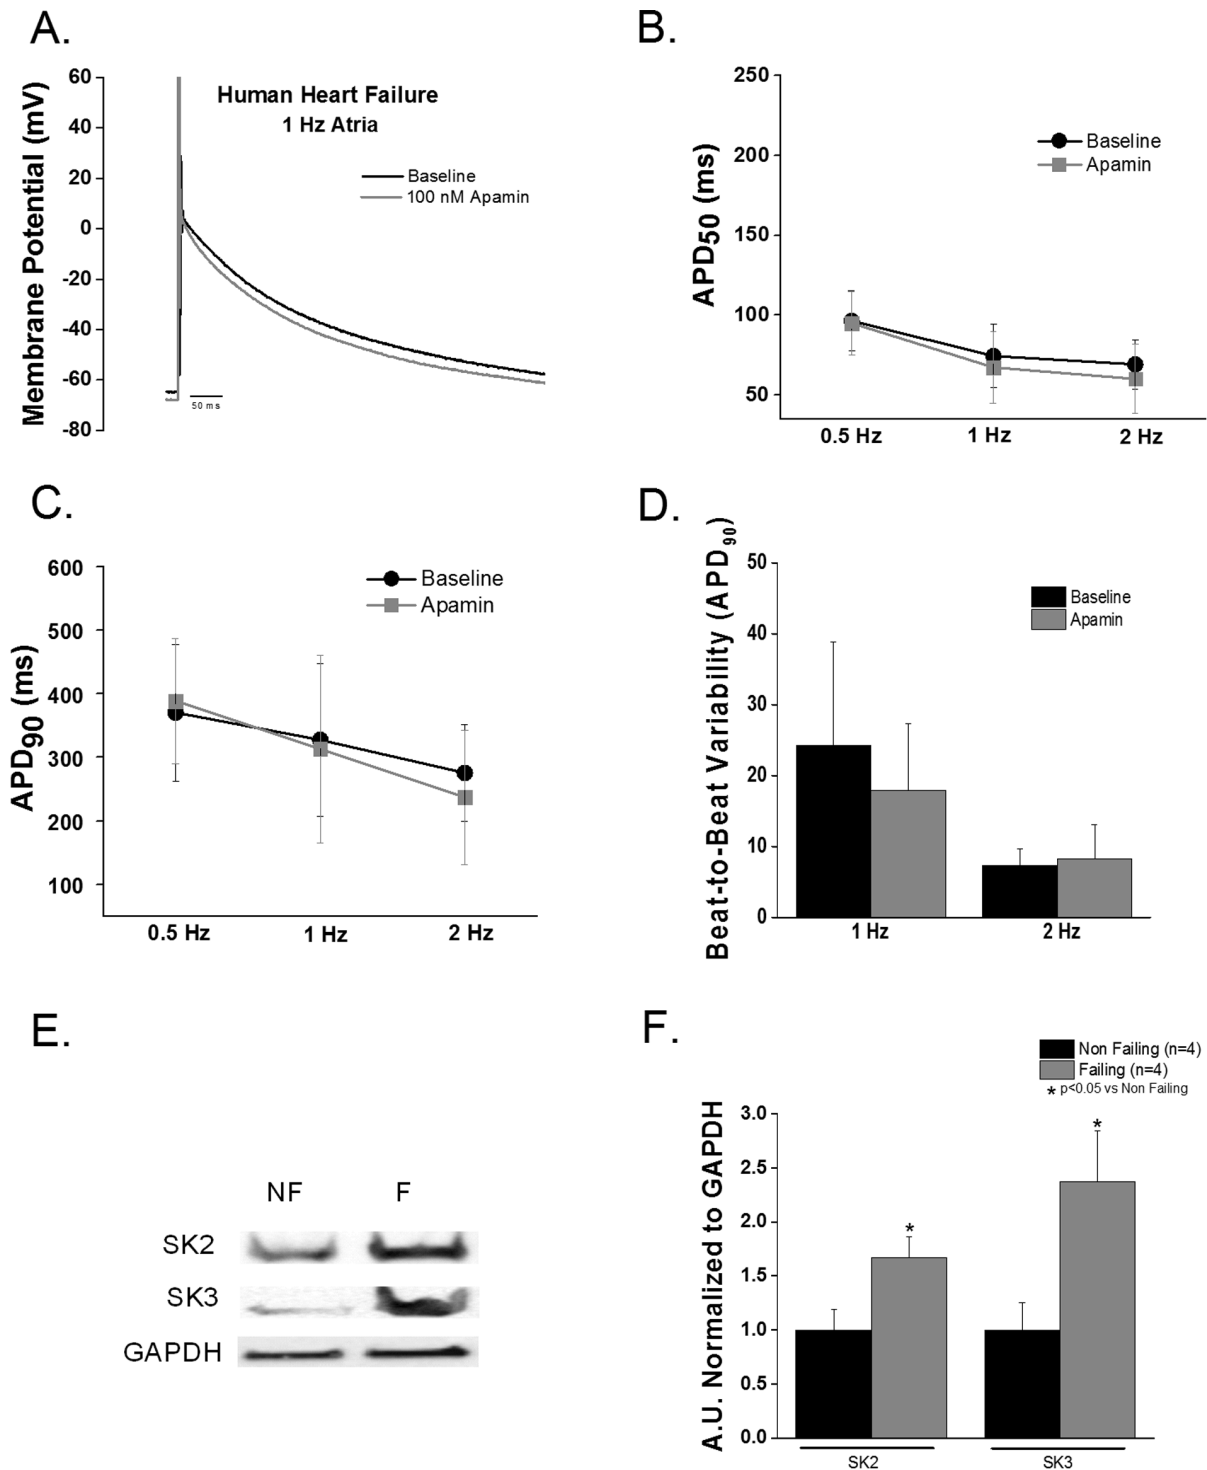

**Figure 8. Apamin does not modulate repolarization in end-stage human HF atrial myocytes.** **A.** Representative atrial action potential tracing recorded at 1 Hz. **B and C.** Apamin did not change APD<sub>50</sub> or APD<sub>90</sub> in human atrial myocytes. (n = 3) **D.** Apamin superfusion did not increase BTBV (ms). **E.** Representative SK2 and SK3 Western blots. **F.** HF increased SK2 and SK3 expression in left atrial tissue (p<0.05 vs non-failing). HF: N = 4 (2 male/2 female); age = 56 ± 4 years and LV ejection fraction of 14.5 ± 1.1%; non-failing controls: n = 4 (2 male/2 female); age = 46 ± 14 years. doi:10.1371/journal.pone.0108824.g008

SK3 expression was found in both 1 month and 4 month HF groups. (p<0.05 vs control) (Figure 4C,D).

**End-stage human heart failure.** In end-stage human HF, inhibition of  $I_{KCa}$  (100 nM apamin) caused a significant prolongation of both APD<sub>50</sub> and APD<sub>90</sub> compared to baseline (p<0.05,

Figure 5 A, B). In addition to AP prolongation, BTBV was significantly increased at 2 Hz in end-stage human HF ventricular cells compared to baseline (Figure 5C).  $I_{KCa}$  blockade induced late phase 3 early afterdepolarizations (EADs) in ~40% of myocytes; while no EADs were observed at baseline (Figure 5D,E).



Human cardiac  $I_{KCa}$  encoding proteins SK2 and SK3 were measured in control and end-stage human HF ventricular tissue lysate (Figure 5F). While there was a trend toward increased SK2 expression in HF, this did not achieve statistical significance. SK3 protein also showed a tendency to increase in human end-stage HF compared to control ( $p = 0.14$ ).

### $I_{KCa}$ inhibition and SK expression in atrial myocytes

**Canine.** Neither HF nor AF caused any change in  $APD_{50}$  compared to control. HF with superimposed AF caused significant  $APD_{90}$  shortening compared to control and 4 month HF ( $p < 0.05$  vs control and 4 Mo HF).  $I_{KCa}$  blockade (100 nM apamin) in control atrial myocytes did not change  $APD_{50}$  (Figure 6A) but caused an unexpected shortening of the  $APD_{90}$  at 0.5 and 1 Hz ( $p < 0.05$  vs baseline) as shown in Figure 6B.  $I_{KCa}$  blockade in the 4 month HF and 4 month HF+AF atrial cells did not cause any change in the  $APD_{50}$  or the  $APD_{90}$  (Figure 6). In further contrast to what we observed in the ventricle, no change in the BTBV of repolarization was observed in either the control, 4 month HF or the 4 month HF+AF groups after  $I_{KCa}$  blockade (data not shown). Thus, contrary to what we observed in the ventricle,  $I_{KCa}$  does not modulate repolarization in the atria in our chronic HF model.

The cardiac  $I_{KCa}$  encoding proteins SK2 and SK3 were measured in left atrial appendage tissue from the three groups (i.e. Control, 4 month HF and 4 month HF+AF). A 3-fold and 2-fold increase in SK2 and SK3, respectively in the 4 month HF group was observed compared to both control and 4 month HF+AF groups ( $p < 0.05$ , Figure 7A, B); while the 4 month HF+AF group did not differ from control. HF, with or without sustained AF, caused a similar significant decrease in calcium transient amplitude compared to controls ( $p < 0.05$  vs control, Figure 7C, D).

**End-stage human heart failure.** Human end-stage HF atrial myocytes showed no significant change in either  $APD_{50}$  or  $APD_{90}$  when treated with apamin (100 nM). Contrary to what we observed in the ventricular cells no difference was observed in BTBV or afterdepolarizations after apamin treatment in human HF atrial cells (Figure 8). SK2 and SK3 were significantly increased in atrial human HF samples compared with atrial samples from non-failing individuals ( $p < 0.05$ , Figure 8).

## Discussion

It is well known that HF is a substrate for AF and these are common co-existing disease states. [1,20] HF patients are at an increased risk for both atrial and ventricular arrhythmias, which contribute to morbidity and mortality. [2] Our main findings were two-fold: first, we did not find any modulation of atrial myocyte repolarization by  $I_{KCa}$  in the settings of normal, failing or sustained AF hearts. Secondly,  $I_{KCa}$  is activated during HF contributing to stability of ventricular repolarization. Thus, block of  $I_{KCa}$  in chronic HF ventricular myocytes prolonged repolarization and increased repolarization instability; these effects have been shown to predict proarrhythmia. [29] Consistent with our findings,  $I_{KCa}$  has been previously suggested to play a protective role in the human ventricle during HF. [14].

One interesting question is how  $I_{KCa}$  becomes an important modulator of ventricular repolarization during heart failure. Potential explanations for this finding include 1) increased channel expression; 2) altered channel sensitivity to calcium; 3) increased calcium concentrations; or 4) loss of other repolarizing current(s), thereby unmasking the role of  $I_{KCa}$ .

In considering these possibilities, we observed an increase in SK3, but not SK2 in our canine HF model. However, we did not

observe a statistically significant increase in either SK2 or SK3 in human HF, although there was a trend toward an increase in SK3 ( $p = 0.14$ ); our findings are in contrast to a previous report where SK2 expression was increased in human HF. [14] While the expression was not significantly increased in human HF, the interspecies differences we observed may be explained by the intrinsic enhanced variability in explanted human end-stage heart failure samples resulting from inhomogeneities in etiology, comorbidities and drug treatments.

Other possible explanations for our findings are altered channel sensitivity to calcium, altered calcium cycling, or altered repolarization. Recently it was reported in human end-stage HF that SK channel sensitivity to calcium was increased in ventricular myocytes, [14] which could contribute in part to our findings. Of note, other proteins such as: protein kinase, calmodulin and protein phosphatase A, [7,30] are also known to contribute to the regulation of SK channels, and thus may modulate  $I_{KCa}$  during HF.

Since  $I_{KCa}$  is a calcium-activated potassium current, HF-induced changes in ventricular calcium handling should directly affect the current. We have previously reported that in our HF model, there is a significant reduction in SR calcium release and calcium transient amplitude, which would reduce rather than augment  $I_{KCa}$ . [31] In support of this interpretation, a recent report indicates that SR release is necessary and sufficient for  $I_{KCa}$  activation. [32] Considering the HF-induced reduction in calcium cycling, and the lack of apamin effect in control cells where calcium cycling is robust, this suggests that altered calcium cycling is not responsible for the protective role of  $I_{KCa}$  in heart failure.

Reduced ventricular repolarization reserve may unmask the role of small currents such as  $I_{KCa}$ . [33] Decreased repolarization reserve is well-described in the ventricle during HF and attributed to reductions in repolarizing currents such as  $I_{K1}$ ,  $I_{Kr}$  and  $I_{Ks}$ . These changes predispose to repolarization instability and/or arrhythmias. [33–35] Since  $I_{KCa}$  blockade prolonged the AP only during HF and not in controls, we suggest that the contribution of  $I_{KCa}$  becomes evident only in settings of decreased repolarization reserve. Thus we suggest that increased channel expression, altered calcium sensitivity of SK channels, or altered repolarization reserve may contribute to the stabilizing role of  $I_{KCa}$ .

$I_{KCa}$  has been suggested as a therapeutic target for AF. [36]  $I_{KCa}$  is defined pharmacologically as apamin-sensitive current, as apamin blocks SK1, SK2 and SK3-encoded channels [9]. One potential problem with this approach is non-selective effects on other ion currents. However, a recent paper surveying apamin effects on human ion channel protein function has demonstrated a high degree of specificity for SK-encoded  $I_{KCa}$ , even at a concentration five-fold higher than in the present study. [10] A potential limitation of previous studies evaluating  $I_{KCa}$  blockade has been a focus on primarily one cardiac chamber; this is limiting since electrical remodeling during HF is chamber-dependent. Specifically during chronic HF, the atrial action potential is shortened [20,37,38] while the ventricular action potential is prolonged. [39].

Interest in  $I_{KCa}$  as a therapeutic target for atrial arrhythmias followed reports of a genetic predisposition to lone AF attributed to a single nucleotide mutation in the gene KCNN3, which encodes for SK3. [40,41] The exact mechanism(s) by which a single mutation affects SK channel function remains unclear. Data supporting both loss of function and gain of function as possible mechanisms for AF have been reported in multiple models. [15,16] Additionally, SK2 and SK3 down regulation have been associated with human AF. [42].

One goal of this study was to elucidate the role of  $I_{KCa}$  in atrial electrophysiology during HF and HF with superimposed AF. Considering HF alone, contrary to previous reports, [15,16]  $I_{KCa}$  blockade failed to prolong the atrial action potential in either control or HF atrial myocytes, at physiologic rates. Our findings are different from a recent report where  $I_{KCa}$  blockade prolonged the atrial action potential in a whole atrial preparation in a reverse rate-dependent fashion; however this only occurred at rates slower than those used in the present study. [16].

The atrial action potential was not prolonged with  $I_{KCa}$  block in HF despite increased both SK2 and SK3 expression. Possible explanations include altered protein trafficking, altered channel calcium sensitivity or altered myocyte calcium handling. We previously reported that HF causes a decrease in calcium current in our 4 months HF tachypacing induced canine model, [20,43] and in the present study we report reduced calcium transient amplitude. Surprisingly, even in control myocytes where the calcium transient and current are normal, apamin failed to prolong the action potential.

Since a role for  $I_{KCa}$  blockers in the treatment of AF has been suggested [11,36] we also evaluated a HF model with superimposed AF. In a recent report in a canine atrial tachypacing AF model, with preserved LV function,  $I_{KCa}$  reduction via a drug which reduced calcium sensitivity of the channel caused a significant prolongation of left atrial action potentials. [15] This contrasts with our AF results in the setting of chronic HF, where  $I_{KCa}$  blockade failed to prolong the action potential. Notably, we observed that atrial HF myocytes had similar calcium transient amplitudes whether or not AF was superimposed, suggesting that calcium cycling in HF may be insufficient to activate the current.

In agreement with a previous study of patients with chronic AF who had decreased expression of SK proteins, we found that AF superimposed on HF caused a decrease in the SK2 and SK3 protein expression relative to HF alone. [42] Thus, the lack of apamin effect in the 4 months HF+AF atrial cells may be explained by a decrease in protein expression and/or a decrease in the calcium available for current activation. Since  $I_{KCa}$  is a very small current ( $\sim 14$  pS) [44] and repolarization is accelerated in AF (AP is shortened [45]), it may be less likely that a change in  $I_{KCa}$  would affect the overall AP duration. The same logic might apply in chronic HF, where atrial repolarization is also accelerated. [20,37].

While we did not find a beneficial role for  $I_{KCa}$  block in HF or AF,  $I_{KCa}$  blockade might have utility in disease states where atrial repolarization is prolonged, or if there is spatial dispersion of atrial repolarization. Additionally, a recent study shows that  $I_{KCa}$  blockade in pulmonary veins terminates AF suggesting a potential role for  $I_{KCa}$  blockers in paroxysmal AF. [15].

## Limitations

Several studies have shown a gradient of SK channel expression and  $I_{KCa}$  current density across the human ventricular wall. [14] However, our experiments used only mid-myocardial myocytes. A similar limitation occurred in the atria, where we only studied cells from the left atrial appendage, and there may be a difference in  $I_{KCa}$  between free wall and appendage. [16] Additionally, we used only single cells which may differ in response compared to coupled cells or intact tissue.

## References

1. Kannel WB, Wolf PA, Benjamin EJ, Levy D (1998) Prevalence, incidence, prognosis, and predisposing conditions for atrial fibrillation: population-based estimates. *Am J Cardiol* 82: 2N–9N.

One confounding variable in studying  $I_{KCa}$  is that the activity varies during the cardiac cycle in a calcium concentration-dependent manner. [32] To assess the role of  $I_{KCa}$  in an integrated system, we used perforated patch action potential recordings to permit maintenance of intrinsic calcium cycling, rather than conducting voltage clamp studies to assess the current.

We relied on a pharmacologic approach to define  $I_{KCa}$ . As with any pharmacologic approach there is a concern about non-specific effects. A recent report evaluated apamin selectivity in multiple human cardiac ion channels including L-type calcium channels, and confirmed the selectivity of apamin for  $I_{KCa}$  at 500 nM which is 5-fold higher than the concentration in the present study. [10] However, it has also been reported that apamin inhibits calcium current in neonatal chick and fetal cells. [46] These reported differences of apamin on calcium current may reflect maturation-dependent differences in channel subunit expression. [47] We did not directly evaluate the effects of apamin on calcium current, but our experimental system is closest to that in the recent report by Yu et al. [10], suggesting that block of calcium current was unlikely to mediate the observed effects of apamin in the present study.

## Conclusions

These experiments highlight the need to evaluate novel therapeutic targets for arrhythmias in both atria and ventricles. In chronic HF,  $I_{KCa}$  plays a protective role in the ventricle and current block is proarrhythmic. Notably, in early HF (1 month canine HF),  $I_{KCa}$  blockade is not proarrhythmic, perhaps reflecting a relatively preserved repolarization reserve with a diminished dependence on  $I_{KCa}$  for repolarization stability compared to chronic HF.

We found that  $I_{KCa}$  does not play a role in repolarization in the atria as current block does not prolong the action potential in either human or canine HF. Similarly,  $I_{KCa}$  does not play a role in repolarization of the atrial AP during sustained AF with concurrent chronic HF, despite increased protein expression.

Collectively, our data do not support a role for  $I_{KCa}$  blockers for the treatment of atrial arrhythmias. Rather, our findings suggest that therapeutic strategies to reduce  $I_{KCa}$  may be unsafe in the setting of atrial arrhythmias with concurrent HF due to potential proarrhythmic effects in the ventricles.

## Acknowledgments

Technical support provided by Jeanne Green and Destiny Allen. Human cardiac tissue was obtained through IRB approved protocols and also through collaboration of the Dorothy Davis Heart and Lung Research Institute of the Ohio State University Wexner Medical Center with the Lifeline of Ohio Organ Procurement program.

## Author Contributions

Conceived and designed the experiments: IMB SG PJM CC. Performed the experiments: IMB VPL PVP PW AB QL. Analyzed the data: IMB VPL PVP PW AB JY PJM CC. Contributed reagents/materials/analysis tools: KM PFB PMIJ AK PJM. Contributed to the writing of the manuscript: IMB VVP VVF SG PJM CC.

2. Wang TJ, Larson MG, Levy D, Vasan RS, Leip EP, et al. (2003) Temporal relations of atrial fibrillation and congestive heart failure and their joint influence on mortality: the Framingham Heart Study. *Circulation* 107: 2920–2925. doi: 10.1161/01.CIR.0000072767.89944.6E.

3. Xu Y, Tuteja D, Zhang Z, Xu D, Zhang Y, et al. (2003) Molecular identification and functional roles of a Ca(2+)-activated K+ channel in human and mouse hearts. *J Biol Chem* 278: 49085–49094. doi: 10.1074/jbc.M307508200.
4. Vergara C, Latorre R, Marrion NV, Adelman JP (1998) Calcium-activated potassium channels. *Curr Opin Neurobiol* 8: 321–329. doi: 10.1016/S0959-4388(98)80056-1.
5. Ro S, Hatton WJ, Koh SD, Horowitz B (2001) Molecular properties of small-conductance Ca2+-activated K+ channels expressed in murine colonic smooth muscle. *Am J Physiol Gastrointest Liver Physiol* 281: G964–G973.
6. Tuteja D, Xu D, Timofeyev V, Lu L, Sharma D, et al. (2005) Differential expression of small-conductance Ca2+-activated K+ channels SK1, SK2, and SK3 in mouse atrial and ventricular myocytes. *Am J Physiol Heart Circ Physiol* 289: H2714–H2723. doi: 10.1152/ajpheart.00534.2005.
7. Xia XM, Fakler B, Rivard A, Wayman G, Johnson-Pais T, et al. (1998) Mechanism of calcium gating in small-conductance calcium-activated potassium channels. *Nature* 395: 503–507. doi: 10.1038/26758.
8. Wei AD, Gutman GA, Aldrich R, Chandry KG, Grissmer S, et al. (2005) International Union of Pharmacology. LII. Nomenclature and molecular relationships of calcium-activated potassium channels. *Pharmacol Rev* 57: 463–472. doi: 10.1124/pr.57.4.9.
9. Grunnet M, Jensen BS, Olesen SP, Klaerke DA (2001) Apamin interacts with all subtypes of cloned small-conductance Ca2+-activated K+ channels. *Pflugers Arch* 441: 544–550.
10. Yu CC, Ai T, Weiss JN, Chen PS (2014) Apamin does not inhibit human cardiac Na+ current, L-type Ca2+ current or other major K+ currents. *PLoS One* 9: e96691. doi: 10.1371/journal.pone.0096691 [doi];PONE-D-14-01991 [pii].
11. Li N, Timofeyev V, Tuteja D, Xu D, Lu L, et al. (2009) Ablation of a Ca2+-activated K+ channel (SK2 channel) results in action potential prolongation in atrial myocytes and atrial fibrillation. *J Physiol* 587: 1087–1100. doi: 10.1113/jphysiol.2008.167718.
12. Gui L, Bao Z, Jia Y, Qin X, Cheng ZJ, et al. (2013) Ventricular tachyarrhythmias in rats with acute myocardial infarction involves activation of small-conductance Ca2+-activated K+ channels. *Am J Physiol Heart Circ Physiol* 304: H118–H130. doi: 10.1152/ajpheart.00820.2011.
13. Chua SK, Chang PC, Maruyama M, Turker I, Shinohara T, et al. (2011) Small-conductance calcium-activated potassium channel and recurrent ventricular fibrillation in failing rabbit ventricles. *Circ Res* 108: 971–979. doi: 10.1161/CIRCRESAHA.110.238386.
14. Chang PC, Turker I, Lopshire JC, Masroor S, Nguyen BL, et al. (2013) Heterogeneous upregulation of apamin-sensitive potassium currents in failing human ventricles. *J Am Heart Assoc* 2: e004713. doi: 10.1161/JAHA.112.004713.
15. Qi XY, Diness JG, Brundel B, Zhou XB, Naud P, et al. (2013) Role of Small Conductance Calcium-Activated Potassium Channels in Atrial Electrophysiology and Fibrillation in the Dog. *Circulation* 127: 430–440. doi: 10.1161/CIRCULATIONAHA.113.003019.
16. Hsueh CH, Chang PC, Hsieh YC, Reher T, Chen PS, et al. (2013) Proarrhythmic effect of blocking the small conductance calcium activated potassium channel in isolated canine left atrium. *Heart Rhythm* 10: 891–898. doi: 10.1016/j.hrthm.2013.01.033.
17. Nishijima Y, Feldman DS, Bonagura JD, Ozkanlar Y, Jenkins PJ, et al. (2005) Canine nonischemic left ventricular dysfunction: a model of chronic human cardiomyopathy. *J Card Fail* 11: 638–644. doi: 10.1016/j.cardfail.2005.05.006.
18. Terentyev D, Gyorke I, Belevych AE, Terentyeva R, Sridhar A, et al. (2008) Redox modification of ryanodine receptors contributes to sarcoplasmic reticulum Ca2+ leak in chronic heart failure. *Circ Res* 103: 1466–1472. doi: 10.1161/CIRCRESAHA.108.184457.
19. Nishijima Y, Feldman DS, Bonagura JD, Ozkanlar Y, Jenkins PJ, et al. (2005) Canine nonischemic left ventricular dysfunction: a model of chronic human cardiomyopathy. *J Card Fail* 11: 638–644.
20. Sridhar A, Nishijima Y, Terentyev D, Khan M, Terentyeva R, et al. (2009) Chronic heart failure and the substrate for atrial fibrillation. *Cardiovasc Res* 84: 227–236. doi: 10.1093/cvr/cvp216.
21. Nishijima Y, Sridhar A, Viatchenko-Karpinski S, Shaw C, Bonagura JD, et al. (2007) Chronic cardiac resynchronization therapy and reverse ventricular remodeling in a model of nonischemic cardiomyopathy. *Life Sci* 81: 1152–1159. doi: 10.1016/j.lfs.2007.08.022.
22. Bonilla IM, Sridhar A, Nishijima Y, Gyorke S, Cardounel AJ, et al. (2013) Differential effects of the peroxynitrite donor, SIN-1, on atrial and ventricular myocyte electrophysiology. *J Cardiovasc Pharmacol* 61: 401–407. doi: 10.1097/FJC.0b013e31828748ca.
23. Bonilla IM, Sridhar A, Gyorke S, Cardounel AJ, Carnes CA (2012) Nitric oxide synthases and atrial fibrillation. *Front Physiol* 3: 105. doi: 10.3389/fphys.2012.00105.
24. Thomsen MB, Volders PG, Beekman JD, Matz J, Vos MA (2006) Beat-to-Beat variability of repolarization determines proarrhythmic outcome in dogs susceptible to drug-induced torsades de pointes. *J Am Coll Cardiol* 48: 1268–1276. doi: 10.1016/j.jacc.2006.05.048.
25. Bonilla IM, Vargas-Pinto P, Nishijima Y, Pedraza-Toscano A, Ho HT, et al. (2013) Ibuprofen and Ventricular Arrhythmia Risk. *J Cardiovasc Electro-physiol*. doi: 10.1111/jce.12327.
26. Weatherall KL, Seutin V, Liegeois JF, Marrion NV (2011) Crucial role of a shared extracellular loop in apamin sensitivity and maintenance of pore shape of small-conductance calcium-activated potassium (SK) channels. *Proc Natl Acad Sci U S A* 108: 18494–18499. doi: 10.1073/pnas.1110724108.
27. Weatherall KL, Goodchild SJ, Jane DE, Marrion NV (2010) Small conductance calcium-activated potassium channels: from structure to function. *Prog Neurobiol* 91: 242–255. doi: 10.1016/j.pneurobio.2010.03.002.
28. Grunnet M, Jespersen T, Angelo K, Frokjaer-Jensen C, Klaerke DA, et al. (2001) Pharmacological modulation of SK3 channels. *Neuropharmacology* 40: 879–887. doi: 10.1016/S0028-3908(01)00028-4.
29. Thomsen MB, Oros A, Schoenmakers M, van Opstal JM, Maas JN, et al. (2007) Proarrhythmic electrical remodeling is associated with increased beat-to-beat variability of repolarisation. *Cardiovasc Res* 73: 521–530. doi: 10.1016/j.cardiores.2006.11.025.
30. Bildl W, Strassmaier T, Thurm H, Andersen J, Eble S, et al. (2004) Protein kinase CK2 is coassembled with small conductance Ca(2+)-activated K+ channels and regulates channel gating. *Neuron* 43: 847–858. doi: 10.1016/j.neuron.2004.08.033.
31. Belevych AE, Terentyev D, Terentyeva R, Nishijima Y, Sridhar A, et al. (2011) The relationship between arrhythmogenesis and impaired contractility in heart failure: role of altered ryanodine receptor function. *Cardiovasc Res* 90: 493–502. doi: 10.1093/cvr/cvr025.
32. Terentyev D, Rochira JA, Terentyeva R, Roder K, Koren G, et al. (2013) Sarcoplasmic reticulum Ca2+ release is both necessary and sufficient for SK channel activation in ventricular myocytes. *Am J Physiol Heart Circ Physiol* In Press. doi: 10.1152/ajpheart.00621.2013.
33. Roden DM (1998) Taking the “idio” out of “idiosyncratic”: predicting torsades de pointes. *Pacing Clin Electrophysiol* 21: 1029–1034.
34. Winslow RL, Rice J, Jafri S, Marban E, O'Rourke B (1999) Mechanisms of altered excitation-contraction coupling in canine tachycardia-induced heart failure, II: model studies. *Circ Res* 84: 571–586. doi: 10.1161/01.RES.84.5.571.
35. Kaab S, Nuss HB, Chiamvimonvat N, O'Rourke B, Pak PH, et al. (1996) Ionic mechanism of action potential prolongation in ventricular myocytes from dogs with pacing-induced heart failure. *Circ Res* 78: 262–273. doi: 10.1161/01.RES.78.2.262.
36. Nattel S (2009) Calcium-activated potassium current: a novel ion channel candidate in atrial fibrillation. *J Physiol* 587: 1385–1386. doi: 10.1113/jphysiol.2009.170621.
37. Workman AJ, Pau D, Redpath CJ, Marshall GE, Russell JA, et al. (2009) Atrial cellular electrophysiological changes in patients with ventricular dysfunction may predispose to AF. *Heart Rhythm* 6: 445–451. doi: 10.1016/j.hrthm.2008.12.028.
38. Schrieck J, Wang Y, Overbeck M, Schomig A, Schmitt C (2000) Altered transient outward current in human atrial myocytes of patients with reduced left ventricular function. *J Cardiovasc Electrophysiol* 11: 180–192.
39. Glukhov AV, Fedorov VV, Kalish PW, Ravikumar VK, Lou Q, et al. (2012) Conduction remodeling in human end-stage nonischemic left ventricular cardiomyopathy. *Circulation* 125: 1835–1847. doi: 10.1161/CIRCULATIONAHA.111.047274.
40. Chang SH, Chang SN, Hwang JJ, Chiang FT, Tseng CD, et al. (2012) Significant association of rs13376333 in KCNN3 on chromosome 1q21 with atrial fibrillation in a Taiwanese population. *Circ J* 76: 184–188. doi: 10.1253/circj.CJ-11-0525.
41. Ellinor PT, Lunetta KL, Glazer NL, Pfeufer A, Alonso A, et al. (2010) Common variants in KCNN3 are associated with lone atrial fibrillation. *Nat Genet* 42: 240–244. doi: 10.1038/ng.537.
42. Yu T, Deng C, Wu R, Guo H, Zheng S, et al. (2012) Decreased expression of small-conductance Ca2+-activated K+ channels SK1 and SK2 in human chronic atrial fibrillation. *Life Sci* 90: 219–227. doi: 10.1016/j.lfs.2011.11.008.
43. Kubalova Z, Terentyev D, Viatchenko-Karpinski S, Nishijima Y, Gyorke I, et al. (2005) Abnormal intrastore calcium signaling in chronic heart failure. *Proc Natl Acad Sci U S A* 102: 14104–14109. doi: 10.1073/pnas.0504298102.
44. Park YB (1994) Ion selectivity and gating of small conductance Ca(2+)-activated K+ channels in cultured rat adrenal chromaffin cells. *J Physiol* 481 (Pt 3): 555–570.
45. Van Wagoner DR, Pond AL, Lamorgese M, Rossie SS, McCarthy PM, et al. (1999) Atrial L-type Ca2+ currents and human atrial fibrillation. *Circ Res* 85: 428–436. doi: 10.1161/01.RES.85.5.428.
46. Bkaily G, Sculptoreanu A, Jacques D, Economos D, Menard D (1992) Apamin, a highly potent fetal L-type Ca2+ current blocker in single heart cells. *Am J Physiol* 262: H463–H471.
47. Brillantes AM, Bezprozvannaya S, Marks AR (1994) Developmental and tissue-specific regulation of rabbit skeletal and cardiac muscle calcium channels involved in excitation-contraction coupling. *Circ Res* 75: 503–510.
